# Supplementary material for: KIT-5-Assisted Synthesis of Mesoporous SnO2 for High-Performance Humidity Sensors with a Swift Response/Recovery Speed
Source: MDPI journal article supplement (doi:10.3390/molecules28041754), 2023-02-12
Supplement: s1 [file s1]

# Supplementary Materials – KIT-5-assisted Synthesis of Mesoporous SnO<sub>2</sub> for High-Performance Humidity Sensors with a Swift Response/Recovery Speed

Katarina Vojisavljević <sup>1,\*</sup>, Slavica M. Savić <sup>2</sup>, Milica Počuča-Nešić <sup>1,3</sup>, Aden Hodžić <sup>4</sup>, Manfred Kriechbaum <sup>5</sup>, Vesna Ribić <sup>1,†</sup>, Aleksander Rečnik <sup>6</sup>, Jelena Vukašinović <sup>1,3</sup>, Goran Branković <sup>1,3,†</sup> and Veljko Djokić <sup>7,8,†</sup>

- <sup>1</sup> Department of Materials Science, Institute for Multidisciplinary Research, University of Belgrade, 11030 Belgrade, Serbia  
<sup>2</sup> Center for Sensing Technologies, BioSense Institute, University of Novi Sad, 21102 Novi Sad, Serbia  
<sup>3</sup> Center of Excellence for Green Technologies, Institute for Multidisciplinary Research, University of Belgrade, 11030 Belgrade, Serbia  
<sup>4</sup> Central European Research Infrastructure Consortium, 34149 Basovizza, Italy  
<sup>5</sup> Institute of Inorganic Chemistry, Graz University of Technology, 8010 Graz, Austria  
<sup>6</sup> Department for Nanostructured Materials, Jožef Stefan Institute, 1000 Ljubljana, Slovenia  
<sup>7</sup> Faculty of Technology and Metallurgy, University of Belgrade, 11000 Belgrade, Serbia  
<sup>8</sup> Innovation Center of the Faculty of Technology and Metallurgy, University of Belgrade, 11000 Belgrade, Serbia  
<sup>†</sup> Present address: Department for Nanostructured Materials, Jožef Stefan Institute, 1000 Ljubljana, Slovenia  
<sup>‡</sup> These authors contributed equally to this work.  
<sup>\*</sup> Correspondence: KV: kvojisavljevic@imsi.bg.ac.rs;

## Transmission electron microscopy

**Table S1** Comparison between theoretical (JCPDF 01 077-0452) and observed *d*-values of SnO<sub>2</sub>-KIT-5 and SnO<sub>2</sub>-R powders.

| (hkl) | SnO <sub>2</sub> -KIT-5<br><i>d</i> <sub>hkl</sub> /Å | SnO <sub>2</sub> -R<br><i>d</i> <sub>hkl</sub> /Å | SnO <sub>2</sub> (JCPDF 01 077-0452)<br><i>d</i> <sub>hkl</sub> /Å |
|-------|-------------------------------------------------------|---------------------------------------------------|--------------------------------------------------------------------|
| (110) | 3.421                                                 | 3.374                                             | 3.362                                                              |
| (101) | 2.715                                                 | 2.664                                             | 2.654                                                              |
| (200) | 2.432                                                 | 2.364                                             | 2.378                                                              |
| (111) | 2.356                                                 | 2.325                                             | 2.318                                                              |
| (210) | 2.170                                                 | 2.132                                             | 2.127                                                              |
| (211) | 1.821                                                 | 1.776                                             | 1.771                                                              |

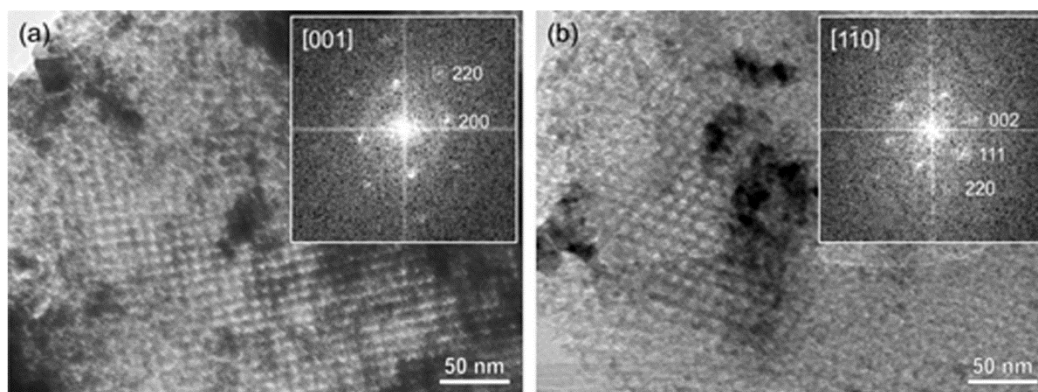

**Figure S1.** TEM analysis of KIT-5 pore distribution within SnO<sub>2</sub>-KIT-5: (a) [001] projection, (b) [110] projection.

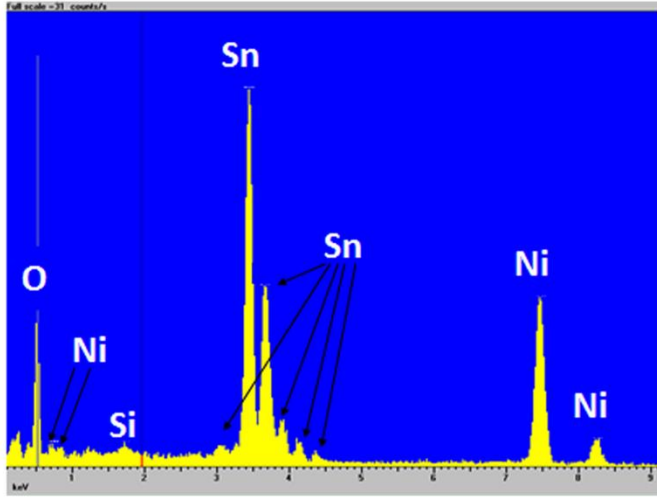

Figure S2. EDXS analysis.

### X-ray diffraction analysis

The XRD patterns of SnO<sub>2</sub>-R and SnO<sub>2</sub>-SG were shown in Figure S3. The average crystallite size of the SnO<sub>2</sub>-R and SnO<sub>2</sub>-SG particles was calculated by applying the Debye-Scherrer equation, Equation (S1):

$$L = K\lambda / \Delta 2\theta \cos \theta \quad (S1)$$

where  $L$  is the mean size of the ordered (crystalline) domains,  $K$  is a dimensionless shape factor with a value close to unity,  $\lambda$  wavelength (0.154 nm<sup>-1</sup>),  $\Delta 2\theta$  is the line broadening at half of the maximum intensity (FWHM), and  $\theta$  is the Bragg angle. It appeared to be 10 nm for SnO<sub>2</sub>-R and 43 nm for SnO<sub>2</sub>-SG.

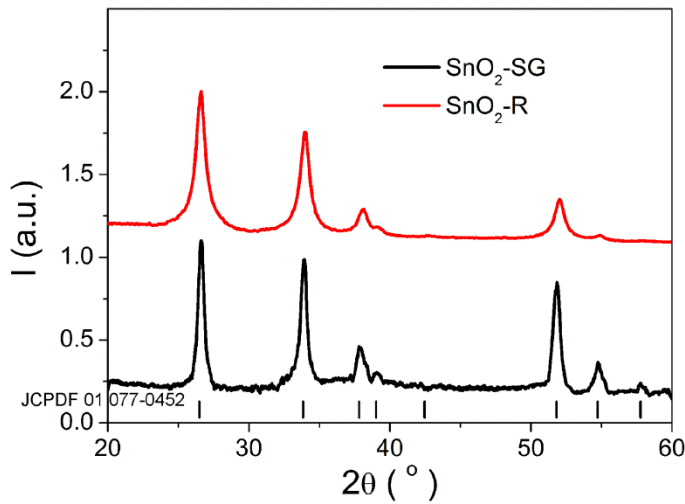

Figure S3. XRD patterns of SnO<sub>2</sub>-SG and SnO<sub>2</sub>-R powders.

### BET

Using the  $S_{\text{BET}}$  values of the SnO<sub>2</sub>-R and SnO<sub>2</sub>-SG and the formula for the BET equivalent particle diameter, Equation (S2):

$$L_{\text{BET}} = (\Psi_A \cdot \Psi_V^{-1}) / (S_{\text{BET}} \cdot \rho_t) \quad (S2)$$

where  $(\Psi_A \cdot \Psi_V^{-1})$  is the shape factor ratio ( $\approx 6$ ),  $S_{\text{BET}}$  is the specific surface area of the powder and  $\rho_t$  is the theoretical density of SnO<sub>2</sub> (6.95 g/cm<sup>3</sup>) [45], the primary particle size values were calculated to be 12.9 and 42.3 nm for the SnO<sub>2</sub>-R and SnO<sub>2</sub>-SG, respectively, and they are in agreement with WAXS-XRD/TEM findings.

## SAXS Parameters Analytics

The spectra of the same capillary (=the background) were subtracted after merging the spectra and the background spectra at the same transmission line. The radius of gyration  $R_g$  and  $I(0)$  were determined *via* the Guinier approximation for globular particles (see Equation S3).

$$I(q) = I(0) \cdot \exp\left(-q^2 \cdot \frac{R_g^2}{3}\right) \quad (S3)$$

The surface  $S$  to volume  $V$  ratio was determined using the approximation derived from Porod's law (see Equation S4) for line-collimated experiments.

$$S/V = 4 \cdot \frac{K_l}{Q_l} \cdot \varphi \cdot (1 - \varphi) \quad (S4)$$

Here  $\varphi$  is the volume fraction, which was set to  $\varphi = 0.5\%$  assuming the general solid state/air ratio for solid samples after transmission normalisation [43,44].  $Q_l$  (the invariant of the first moment of the smeared intensity) was determined by:

$$Q_l = \int_0^\infty q \cdot I(q) dq \quad (S5)$$

and  $K_l$  (the invariant of the first moment of the smeared intensity) was determined by fitting:

$$I(q) = K_l/q^3 \quad (S6)$$

All data were evaluated using SAXS quant 3.100 (Anton Paar GmbH, Austria).

## Complex impedance analysis

The change in complex impedance over 30–90% RH range for TF(SnO<sub>2</sub>-R) and TF(SnO<sub>2</sub>-SG), measured at 50 °C is shown in Figure S4(a). A 1.9 order of change in the impedance magnitude in the 30-90% RH range is observed for the TF(SnO<sub>2</sub>-R) sensor, while these values for the and TF(SnO<sub>2</sub>-SG) is found to be 0.35 order.

Figure S4(b) presents the frequency dependence of the complex impedance of TF(SnO<sub>2</sub>-R) sensor measured in the relative humidity 30–90% RH range at 50 °C. With increase in RH the impedance decreases more slowly with frequency, especially at high RH (above 70% RH). In addition, an increase in RH from 30% to 90% more noticeable influences a decrease of complex impedance in the lower frequency range. For example, at 42 Hz the impedance of 17.3 MΩ is measured at 30% RH and it lowers to 102 kΩ at 90% RH. This operating temperature (50 °C) resulted in similar behavior as observed at 25 °C for TF(SnO<sub>2</sub>-R) sensor, but with overall lower measured impedances.

Hysteresis curve is measured at 100 Hz and 50 °C for TF(SnO<sub>2</sub>-R) sensor, and it is presented in Figure S4(c). The adsorption and desorption curves for the TF(SnO<sub>2</sub>-R) sensor nearly overlay each other showing a small hysteresis error of 3.2%, which represents a good reliability of this sensor.

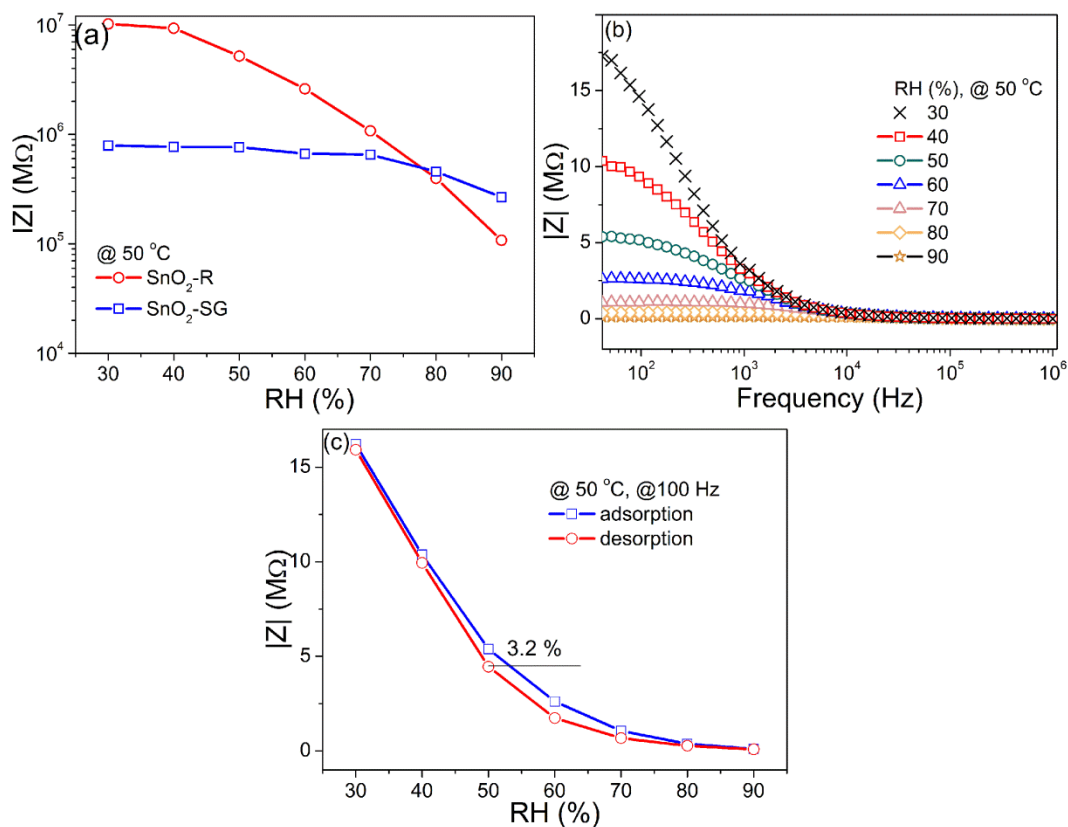

**Figure S4.** (a) The humidity sensing curves of fabricated, SnO<sub>2</sub>-R and SnO<sub>2</sub>-SG sensors presented as the change of complex impedance with a relative humidity change in the 30–90% RH range; (b) the change of the complex impedance with frequency of the TF(SnO<sub>2</sub>-R) sensor at 50 °C exposed to the certain RH values; (c) hysteresis behavior of the TF(SnO<sub>2</sub>-R) over 30-90% RH range at 50 °C.

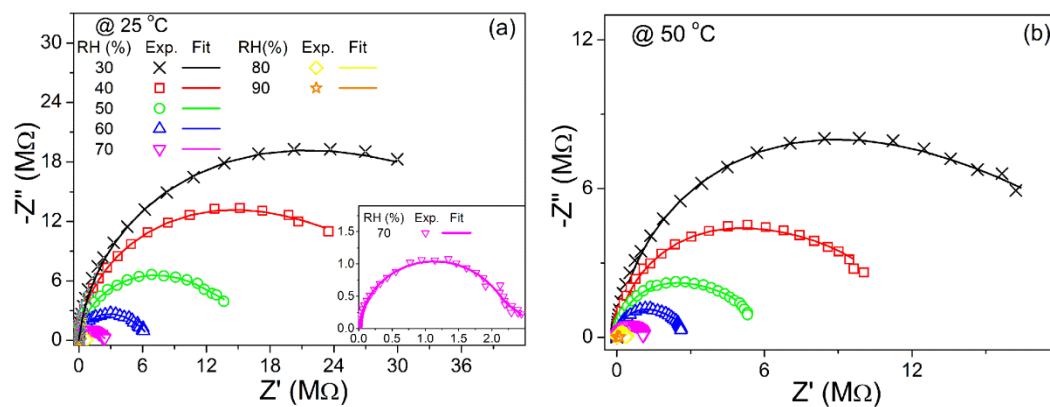

**Figure S5.** Cole-Cole plots of the TF(SnO<sub>2</sub>-R) sensor measured over 30-90% RH range at the temperature (a) 25 °C and (b) 50 °C; experimental data are presented by symbols, simulated by lines.

**Table S2** The area under deconvoluted O<sub>1</sub>-O<sub>3</sub> and O<sub>tot.</sub> peaks from the high-resolution O 1s spectra of different SnO<sub>2</sub>.

| Sample                   | Area under the O <sub>1</sub> -O <sub>3</sub> and O <sub>tot.</sub> peaks |                |                |                   |                                                         |                                                                            |                                           |
|--------------------------|---------------------------------------------------------------------------|----------------|----------------|-------------------|---------------------------------------------------------|----------------------------------------------------------------------------|-------------------------------------------|
|                          | O <sub>1</sub>                                                            | O <sub>2</sub> | O <sub>3</sub> | O <sub>tot.</sub> | O <sub>latt.</sub><br>O <sub>1</sub> /O <sub>tot.</sub> | O <sub>deff.</sub><br>[O <sub>2</sub> +O <sub>3</sub> /O <sub>tot.</sub> ] | [O <sub>deff.</sub> /O <sub>latt.</sub> ] |
| TF(SnO <sub>2</sub> -SG) | 37025                                                                     | 6405           | 1417           | 44849             | 0.8255                                                  | 0.1744                                                                     | 0.2112                                    |
| TF(SnO <sub>2</sub> -R)  | 34030                                                                     | 8549           | 2020           | 44599             | 0.7630                                                  | 0.2370                                                                     | 0.3106                                    |

## References

- [43] A. Hodzic, M. Llusa, N. Heigl, W. Tritthart, S.D. Fraser, P. Laggner, J.G. Khinast, Effect of process variables on the Small and Wide Angle X-ray Scattering (SWAXS) patterns of powders, granules and pharmaceutical tablets, *Powder Technol.* 221 (2012) 447-452.
- [44] A. Hodzic, M. Llusa, S.D. Fraser, O. Scheibelhofer, D.M. Koller, F. Reiter, P. Laggner, J.G. Khinast, Small- and wide-angle X-ray scattering (SWAXS) for quantification of aspirin content in a binary powder mixture, *Int. J. Pharmaceut.* 428 (2012) 91-95.
- [45] J.S. Reed, *Principles of Ceramics Processing*, John Wiley&Sons, New York, 1995.
